# Supplementary material
Source: publisher site journal article supplement (https://www.dovepress.com/article/312117)

**TableS1: Forward(F) and Reverse(R) primer sequences of top 5 DEGs in upregulated and downregulated groups**

| Gene Name |   | Sequence (5' -> 3')     |
|-----------|---|-------------------------|
| Tmem176a  | F | GCCGGATGCTCATTGCTAAG    |
|           | R | ATGGCCTATGTAGAGGGTTCC   |
| Suclg2    | F | GGAGTGAGAGTGCAGAGGTT    |
|           | R | AACACCTCCTTTCAAACCGC    |
| Ccdc86    | F | CGGATCACCCGGTCCTAGA     |
|           | R | GGGGAGGTAATTTGGATGGCT   |
| Scn9a     | F | TGGATTCCCTTCGTTACAGA    |
|           | R | GTCGCAGATACATCCTCTTGTTT |
| Ctsc      | F | GTTCCCGAAGCGACATTAAT    |
|           | R | TCGTAGGCAGTATCCAATTCTT  |
| Ctdnep1   | F | TAGAAGTGGTAAGCCAGTGGT   |
|           | R | GTGCAGTGCTGTCTGTAGT     |
| Rom1      | F | CTCCAACCCCGTATCCGTTTG   |
|           | R | GAGCAGGGAATGAACAAGAGG   |
| Susd2     | F | GGCAATACTACGGCACTTCAG   |
|           | R | CTCATAGCCCCACAGCTCAAT   |
| Gtpbp8    | F | GCAGCGGCTAGGTTGAGTC     |
|           | R | GGGACGTGCTGTAAACCCG     |
| Fggy      | F | ATTTGCTTTTCAACCCTATCCCC |
|           | R | AGCCTTCTTAATCAGATCCAGGT |

**TableS2: Relationships between Hub DEGs and potential candidate drugs from DGIdb database.**

| Gene                       | Drug            | Gene        | Drug               |
|----------------------------|-----------------|-------------|--------------------|
| IL1B                       | Gallium Nitrate | TNF         | Pomalidomide       |
|                            | Rilonacept      |             | Infliximab         |
|                            | Minocycline     |             | Certolizumab Pegol |
|                            | Canakinumab     |             | Adalimumab         |
|                            | Donepezil       |             | Etanercept         |
|                            | Melatonin       |             | Inamrinone         |
|                            | Verapamil       |             | Thalidomide        |
|                            | Tiludronic Acid |             | Golimumab          |
|                            | Binimetinib     |             | Epinephrine        |
|                            | Hydroquinone    |             | Clenbuterol        |
|                            | Pentoxifylline  |             | Pseudoephedrine    |
|                            | Diacerein       |             | Chloroquine        |
|                            | Lansoprazole    |             | Methylene Blue     |
|                            | Infliximab      |             | Stavudine          |
|                            | Aspirin         |             | Rifampin           |
|                            | Ustekinumab     |             | Miltefosine        |
|                            | Risedronic Acid |             | Carboplatin        |
|                            | Hydrocortisone  |             | Amphotericin B     |
|                            | Glucosamine     |             | Isoniazid          |
|                            | Morphine        |             | Ethambutol         |
|                            | Raloxifene      |             | Binimetinib        |
|                            | Nicardipine     |             | Gentamicin         |
|                            | Pentamidine     |             | Meropenem          |
|                            | Acitretin       |             | Pentoxifylline     |
|                            | Pravastatin     |             | Lenalidomide       |
|                            | Erythromycin    |             | Carbamazepine      |
|                            | Omeprazole      |             | Atorvastatin       |
|                            | Alteplase       |             | Sorafenib          |
|                            | Cefaclor        |             | Lactulose          |
|                            | Thyroglobulin   |             | Bupivacaine        |
|                            | Rabeprazole     |             | Alteplase          |
|                            | Ofloxacin       |             | Midazolam          |
|                            | TLR7            |             | Imiquimod          |
| Hydroxychloroquine         |                 | Insulin     |                    |
| Hydroxychloroquine Sulfate |                 | Cefotaxime  |                    |
| Chloroquine                |                 | Methimazole |                    |
| TLR4                       | Naloxone        | Digoxin     |                    |
|                            | Mifamurtide     | Glucosamine |                    |

|        |                    |       |                    |
|--------|--------------------|-------|--------------------|
|        | Cyclobenzaprine    |       | Gemcitabine        |
|        | Nelfinavir         |       | Risperidone        |
|        | Pravastatin        |       | Propylthiouracil   |
|        | Tacrolimus         |       | Omeprazole         |
|        | Ritonavir          |       | Spirolactone       |
|        | Alcohol            |       | Pyridoxine         |
|        | Methotrexate       |       | Rabeprazole        |
|        | Infliximab         |       | Pyrazinamide       |
|        | Saquinavir         |       | Glimepiride        |
| CXCL10 | Methylprednisolone |       | Hydroxychloroquine |
|        | Ritonavir          |       | Cyclosporine       |
|        | Stavudine          |       | Pomalidomide       |
|        | Atorvastatin       | MYD88 | Ibrutinib          |
|        | Atropine           |       | Fentanyl           |
|        | Testosterone       |       | Vorinostat         |
|        | Oxaliplatin        |       |                    |

## Supplementary Figures Legend:

**Fig. 1S: The GO annotation and KEGG analysis results of DEGs contained in three vital**

**PPI modules.** 1sa: the comprehensive analysis of DEGs extracted from three vital PPI modules in the KEGG database. 1sb-d: represented the biological processes (BPs), cellular components (CCs) and molecular functions (MFs) analysis results for DEGs in three PPI modules.

**Fig. 2S: Matching results between differential expressed genes(DEGs) and transcription**

**factors(TFs).** 2a: the comprehensive analysis of whole DEGs- TFs matching results. 2b: one important module of DEGs-TFs after filtered by MCODE. Grey circles stand for DEGs and blue circles stand for TFs.

Fig S1

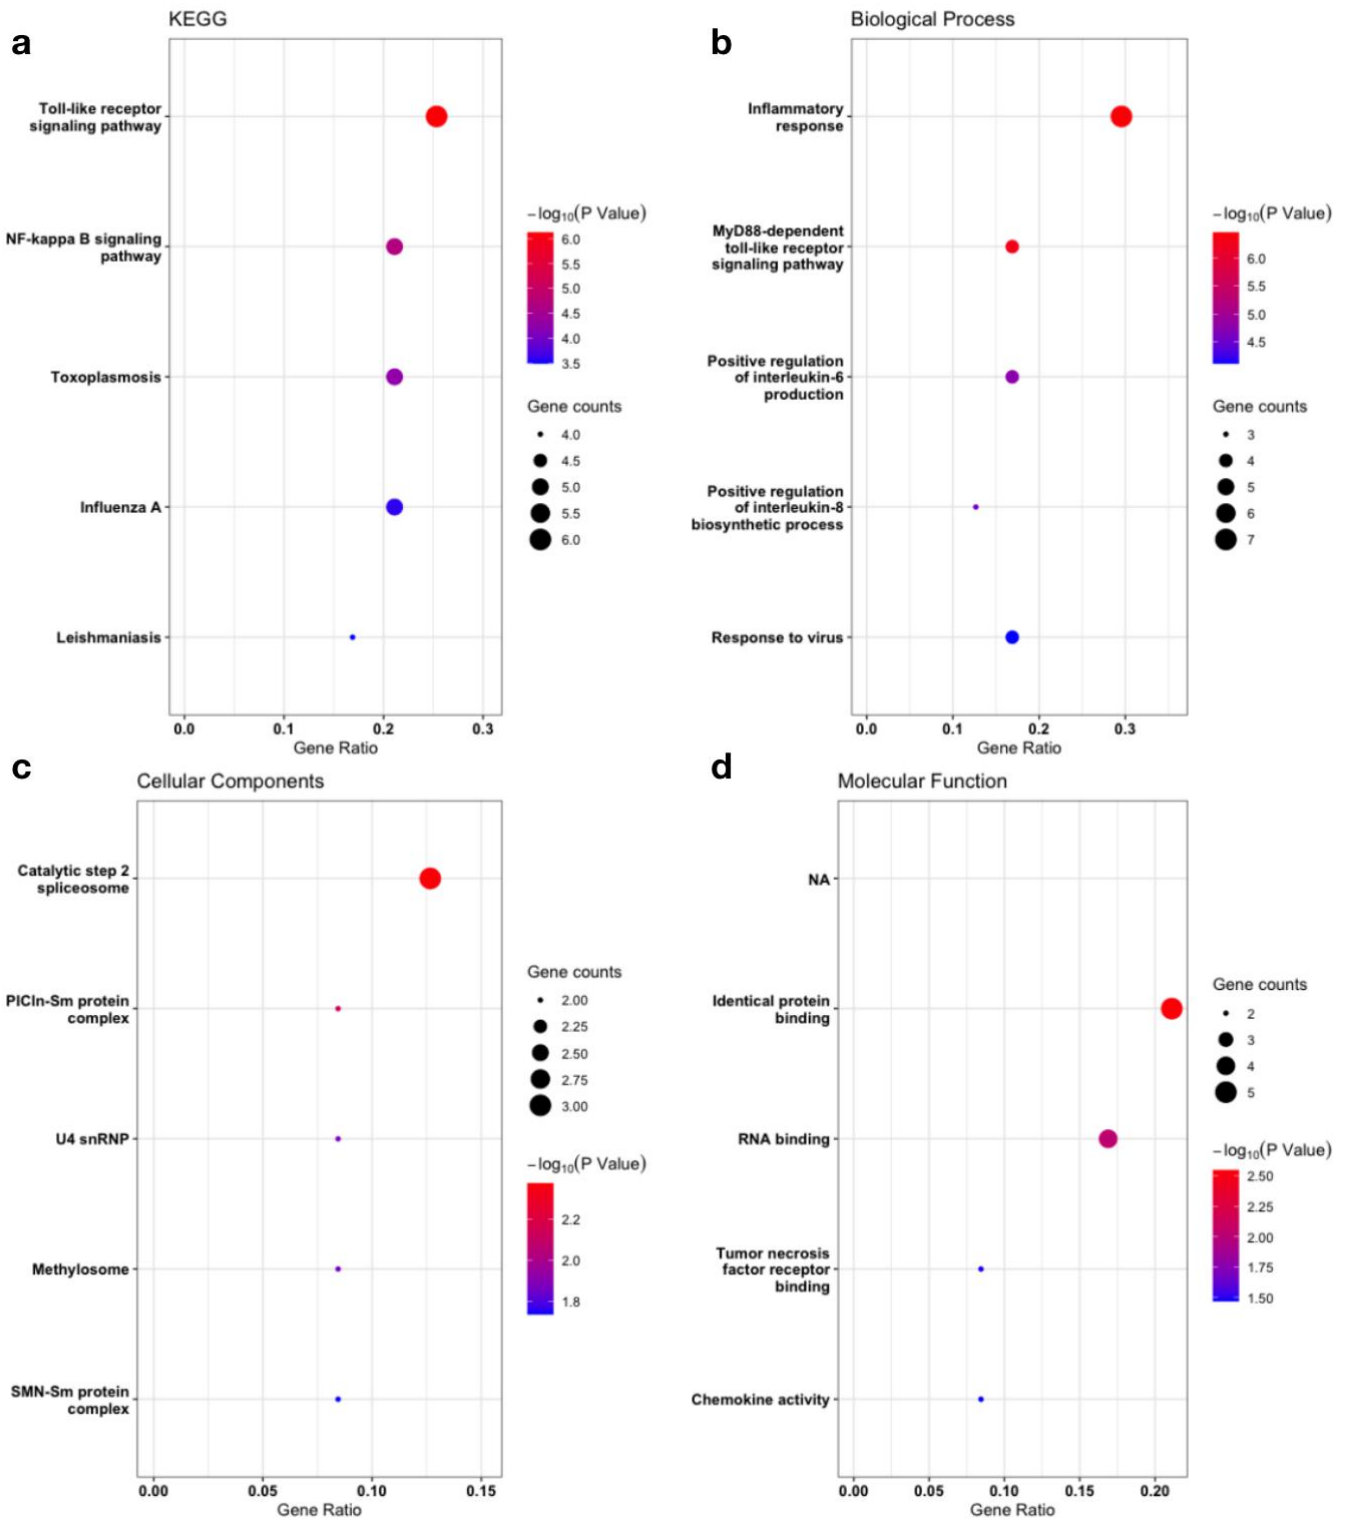

Fig S2

a

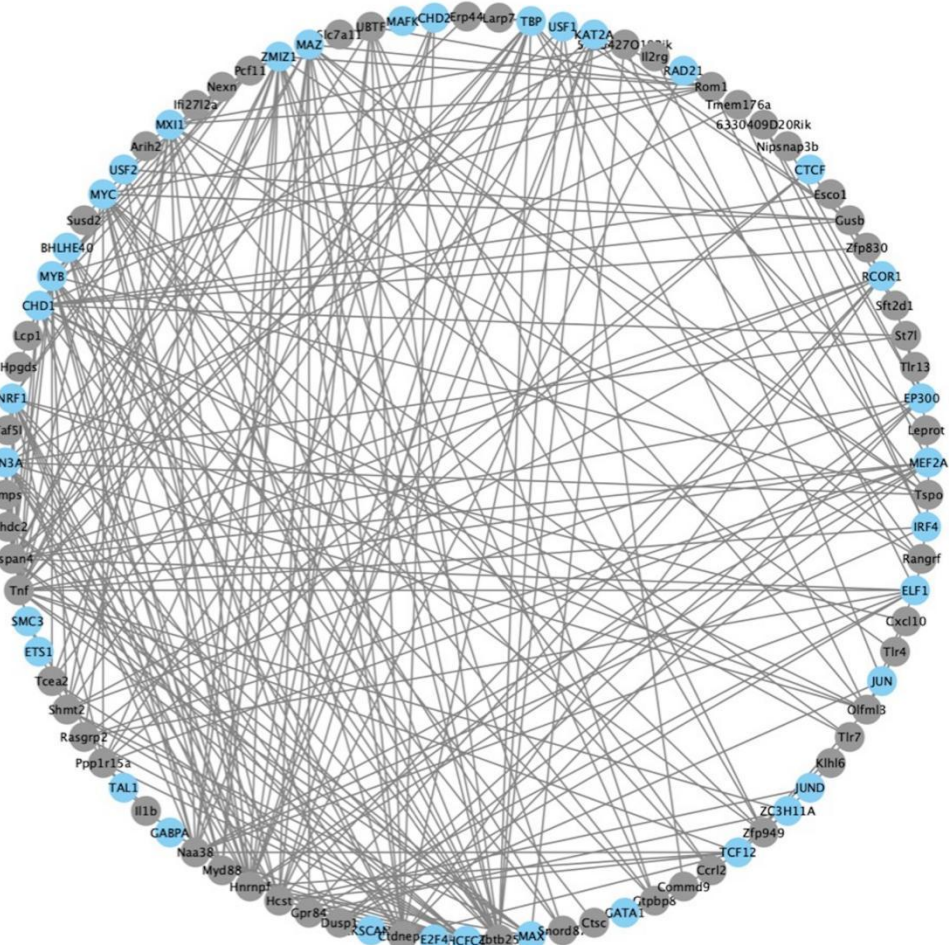

b

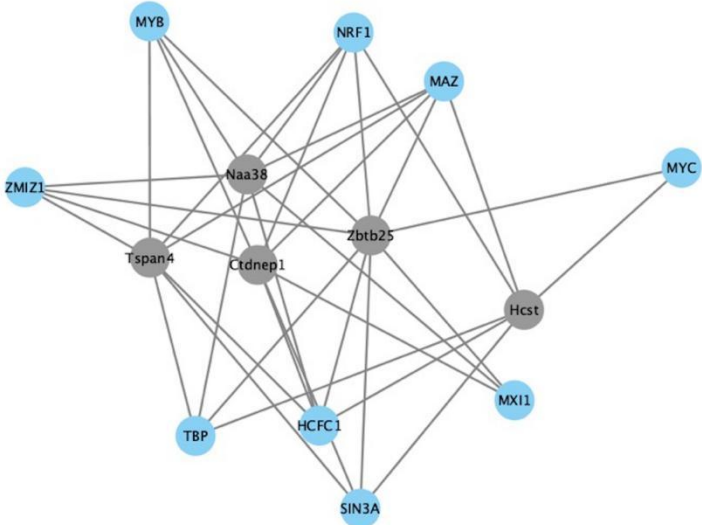

Supplement: Supplementary file 1 [file get_supplementary_file.php]
